1 Reevaluating the Role of ACE Inhibitors in Skin Fibrosis Risk: Evidence from  
2 Mendelian Randomization

3 Running title: ACEI does not decrease skin fibrosis

4 Yangyang Wei<sup>1,2,\*</sup>, Ziqi Wan<sup>2,\*</sup>, Yiwen Jiang<sup>2</sup>, Zhengye Liu<sup>3</sup>, Ming Yang<sup>4,#</sup>, Jieying  
5 Tang<sup>1,#</sup>

6 1. Department of Plastic Surgery, Beijing Tsinghua Changgung Hospital, School of  
7 Clinical Medicine, Tsinghua University, Beijing, China.

8 2. Eight-year Program, Peking Union Medical College and Chinese Academy of  
9 Medical Sciences, Beijing, China.

10 3. Department of Plastic and Aesthetic Center, The First Affiliated Hospital, School of  
11 Medicine, Zhejiang University, Hangzhou, Zhejiang, China.

12 4. Department of Cardiology, Peking Union Medical College Hospital, Chinese  
13 Academy of Medical Sciences & Peking Union Medical College, Beijing, China.

14

15 \*Contributed equally

16 #Corresponding authors: Dr. Jieying Tang, Department of Plastic Surgery, Beijing  
17 Tsinghua Changgung Hospital, School of Clinical Medicine, Tsinghua University,  
18 Beijing, China. Tel: 8613811271136. Email: tjya01274@btch.edu.cn

19 Dr. Ming Yang, Department of Cardiology, Peking Union  
20 Medical College Hospital, Chinese Academy of Medical Sciences & Peking Union  
21 Medical College, Beijing, China. Tel: 86-10-69155005. Email: yangming@pumch.cn

22

23 **Fund:** Beijing Tsinghua Changgung Hospital Fund (Grant No. 12023C1004)

24

## 25 **Interest Statement**

26 All of us declare that we have no competing interests.

27

## 28 **Ethical Approval**

29 Not Applicable.

30 **NOTE:** This preprint reports new research that has not been certified by peer review and should not be used to guide clinical practice.

31 **Ethnic Statement**

32 Not Applicable.

33

34 **Data Availability Statement**

35 Sources of full summary GWAS datasets were listed in Supplementary File 2. No new

36 data was generated from recurrent study.

37

38 **Author Contributions**

39 Conceptualization: The study was initially conceptualized by YW, ZW and JT. They  
40 developed the research idea and designed the overall framework of the study.

41 Methodology: Methodology was developed by ZW, YJ and ZL. They were  
42 responsible for designing and implementing the experimental protocols.

43 Investigation: Investigation and data collection were primarily conducted by YW, ZW  
44 and JT. They carried out the experiments and gathered the necessary data.

45 Data Analysis: Data analysis was performed by YW and ZW. They processed the raw  
46 data and conducted the statistical analyses.

47 Writing - Original Draft Preparation: The original draft of the manuscript was written  
48 by YW and ZW. They prepared the initial version of the paper, including the  
49 introduction, methods, results, and discussion sections.

50 Writing - Review & Editing: Review and editing of the manuscript were conducted by  
51 YJ, ZL, MY and JT. They reviewed the draft for important intellectual content and  
52 made revisions.

53 Funding Acquisition: Funding for the study was secured by MY and JT. They applied  
54 for and obtained the necessary grants to support the research.

55 Supervision: Supervision of the entire project was provided by MY and JT. They  
56 oversaw the project progress and provided guidance throughout the research.

57 Project Administration: Project administration, including coordination of research  
58 activities and maintaining timelines, was managed by MY and JT.

59

60 **Manuscript Count: 3862**

61 **Figure count: 4, Table count: 7**

62

63 **Abstract:**

64 **Background:** Skin fibrosis, characterized by excessive extracellular matrix  
65 deposition, leads to hypertrophic scars and keloids, which are both common and often  
66 detrimental conditions. Angiotensin-converting enzyme (ACE) inhibitors have shown  
67 promise in animal studies and limited clinical trials for reducing scar formation.  
68 However, the causal relationship between ACE inhibition and skin fibrosis remains  
69 unclear.

70 **Methods:** This study employed two-sample Mendelian randomization (MR) analysis  
71 to investigate the causal effect of ACE inhibition on skin fibrotic diseases. We utilized  
72 genetic variants associated with serum ACE levels, ACE inhibition, and effect of  
73 decreasing blood pressure by ACE inhibition as instrumental variables. We analyzed  
74 the association between these exposures and the incidence of skin fibrosis,  
75 hypertrophic scars, and keloids using various MR methods.

76 **Results:** We found no significant causal relationship between genetically proxied  
77 serum ACE levels, or local skin tissue ACE expression and the risk of skin fibrosis,  
78 hypertrophic scars, or keloids. Additionally, there was no direct causal relationship  
79 between the effect of ACE inhibitors on blood pressure reduction and the risk of skin  
80 fibrotic diseases. However, we observed a significant negative association between  
81 systolic blood pressure (SBP) and the risk of hypertrophic scars. Conversely, we  
82 found a positive association between  $\beta$ -blockers and the risk of skin fibrosis.

83 **Conclusion:** Our findings suggest that ACE inhibitors do not have a direct causal  
84 effect on the risk of skin fibrotic diseases, including hypertrophic scars and keloids.  
85 This challenges the potential of ACE inhibitors as a therapeutic option for preventing  
86 or treating these conditions.

87

88 **Keywords:** skin fibrosis, angiotensin-converting enzyme, Mendelian Randomization

89

## 90 **Introduction**

91 Skin fibrosis involves the deposition of extracellular matrix of dermis, a process that  
92 can occur in all kinds of wound healing of injuries.<sup>1</sup> Hypertrophic scars and keloids  
93 are two common types of excessive scar caused by skin fibrosis. Hypertrophic scar is  
94 that scar proliferation stays within the limits of the edges of the initial scar, whereas  
95 keloid is characterized by pseudo-tumor proliferation extending over the edges of the  
96 initial wound.<sup>1,2</sup> These conditions are highly prevalent in population, affecting  
97 patients with all kinds of skin wounds including surgical ones. Excessive scars can  
98 lead to unexpected changes in appearance, causing pain and functionally impairing  
99 patients' quality of life. Current conservative treatments for excessive scarring include  
100 cryotherapy, corticosteroid injections or tapes, chemotherapy and surgery.<sup>1</sup> Few  
101 interventions target the molecular mechanism specifically. Mechanisms of skin  
102 fibrosis are not completely understood, involving intricate pathways such as  
103 inflammatory reactions and hormone regulation.<sup>3</sup>

104 Angiotensin-converting enzyme (ACE) is a well-known molecule that can increase  
105 blood pressure by converting angiotensin I to angiotensin II within renin-angiotensin  
106 system (RAS).<sup>4</sup> Angiotensin II can bind to the Type I angiotensin receptor (AT1  
107 receptor) and initiate the complex downstream effects. The serum ACE has been  
108 demonstrated to be critical in the development and progression of fibrosis in multiple  
109 organs, including heart, liver, and kidney.<sup>5-9</sup> Effects of angiotensin II include the  
110 increase of collagen and fibronectin synthesis, which are ultimately associated with  
111 fibrosis in different organs. Given its pivotal role in the regulation of RAS, ACE has  
112 been inferred to be a therapeutic potential target for skin fibrosis due to its effects on  
113 inflammatory reaction and homeostasis of skin healing.<sup>5</sup> Animal studies have  
114 provided evidence that ACE gene deficiency decreases scar formation in rats  
115 effectively.<sup>11,12</sup> A study on rabbits also demonstrated that oral ACE inhibitor  
116 (Enalapril) effectively decreased hypertrophic scars on rabbit ears.<sup>13</sup> And several  
117 clinical researches reported the effectiveness of ACE inhibitors in decreasing the  
118 formation of excessive scars. A retrospective chart review study on bilateral breast  
119 reduction surgery (n = 961) discovered patients with an ACE inhibitors or angiotensin

120 receptor blocker (ARB) exhibited a significantly lower incidence of being diagnosed  
121 as hypertrophic scar.<sup>14</sup> Furthermore, in another double-blind clinical trial conducted  
122 in Iran population (n = 30), patients treated with local topical Enalapril exhibited  
123 hypertrophic scars with significantly smaller mean thickness than the placebo-treated  
124 ones, along with a significantly lower mean itching score.<sup>15</sup> However, the sample  
125 sizes of the clinical trial were insufficiently large and only involved Iran population.  
126 The researches were limited by study design.<sup>16</sup>

127 Mendelian randomization is a method to explore the causal effect of two traits  
128 (exposure and outcome) via genetic instrumental variants (IVs).<sup>17, 18</sup> It holds three  
129 assumptions: 1) IVs are extensively associated with exposure; 2) There are no  
130 confounders between the instruments and outcome; 3) IVs' effect on outcome can  
131 only be exerted via exposure. MR provides a convenient method for exploring the  
132 causal relationship between phenotypes with evidence of nearly the same level as  
133 randomized controlled trial (RCT) when conducting RCTs is challenging. However,  
134 there has not been an exploration of the causal relationship between ACE inhibition  
135 and diseases related to skin fibrosis using MR analysis.

136 Here we aimed to explore the causal effect of ACE inhibitors (ACEi) on excessive  
137 scars related to skin fibrosis, including hypertrophic scar and keloids, by two-sample  
138 MR analysis from multiple dimensions. We investigated the causal effects of  
139 genetically proxied serum ACE, inhibition of ACE and systolic and diastolic blood  
140 pressure (SBP/DBP), respectively, on the incidence of skin fibrosis. And we further  
141 explored the causal effects of SBP, DBP,  $\beta$  blockers and calcium channel blockers,  
142 angiotensin receptor blockers and excessive scarring related to skin fibrosis.

143

## 144 **Methods**

### 145 **Study design**

146 The study design is illustrated in Figure 1. To investigate the causal effect of ACE  
147 inhibitors on skin fibrotic diseases, we conducted MR analysis with exposures of  
148 serum ACE, genetically-proxied inhibition of serum ACE, and effect of increasing  
149 SBP and DBP by ACE, respectively. Furthermore, we employed Summary-based MR

150 analysis (SMR) to explore the causal effect of ACE expression in local skin tissue on  
151 skin fibrotic diseases. Considering that the target of Type 1 angiotensin II receptor  
152 blockers (ARBs), AT1 receptor is the main downstream receptor of angiotensin II, we  
153 investigated causal relationship between ARBs and skin fibrotic diseases. Moreover,  
154 considering that blood pressure might be a risk factor of skin fibrotic diseases<sup>19, 20</sup>, in  
155 order to investigate whether the effect of ACE on skin fibrotic diseases is through the  
156 blood pressure, we also investigated the causal effect of blood pressure and targets of  
157 other anti-hypertension drugs ( $\beta$  blockers and calcium channel blockers, abbreviated  
158 as BBs and CCBs) on skin fibrotic diseases through MR analysis. All the genetic IVs  
159 were chosen on autosomes in order to avoid sex-specific effects.<sup>21</sup>

## 160 **Data sources**

161 For serum ACE concentration, we initially utilized single SNP “rs4343” as IV of  
162 serum ACE. Rs4343 is located in the *ACE* gene, which is extensively associated with  
163 an indel known as *Alu* in the 16<sup>th</sup> intron and then associated with expression of *ACE*.  
164<sup>23</sup> Rs4343 exhibits the strongest association with serum ACE inhibition ( $p = 1.53e-213$ )  
165 among SNPs according to the group of IV proxied serum ACE inhibition.<sup>24</sup>  
166 Additionally, we utilized another group of IVs from a protein quantitative trait locus  
167 (pQTL) research of serum ACE of 35,275 individuals with Island ancestry. The  
168 population shares a similar age, gender, and BMI structure with the UKB cohort.<sup>22</sup>  
169 Furthermore, in order to supply more evidence of the causal relationship between  
170 serum ACE inhibition and skin fibrotic diseases, we utilized a group of IVs (including  
171 rs4343) to proxy serum ACE inhibition from a previous MR study, which was from a  
172 pQTL of 4,174 individuals from Genetic Epidemiology Research on Adult Health and  
173 Aging.<sup>24</sup>

174 We initially employed single SNP “rs4291” to proxy the effect of ACE inhibition on  
175 decreasing SBP. Rs4291 is located on the promoter of *ACE* gene, which is also  
176 extensively associated with the indel *Alu* and exhibits the most significant correlation  
177 with the effect of ACE inhibition on decreasing SBP.<sup>25</sup> Its effect was from a  
178 meta-analysis of GWAS covered 757,601 individuals with European ancestry of UKB  
179 individuals and International Consortium of Blood Pressure GWAS.<sup>26</sup> Then we

180 utilized another group of IV associated with the decrease effect of SBP by ACE  
181 (containing 2 SNPs) extracted by a previous MR study, whose effect was from the  
182 mentioned meta-analysis covered 757,601 individuals.<sup>24</sup> We accessed GWAS data of  
183 SBP and DBP from a previous study encompassing 469,767 and 490,469 individuals  
184 within European ancestry in UK Biobank cohort.<sup>28</sup> And we selected SNPs that have  
185 strong relevance ( $p < 5e-8$ ) with serum ACE according to the mentioned pQTL, and  
186 extracted their effects on SBP or DBP from these two GWAS datasets of SBP and  
187 DBP. From this set of SNPs, we further included SNPs that also had strong relevance  
188 of SBP or DBP ( $p < 5e-6$ ) to proxy the ACE-induced increase of SBP or DBP.

189 For local expression of *ACE* gene in skin tissue, summary data of expression  
190 quantitative trait locus research (eQTL) of local tissue was downloaded from GTEx  
191 v8 data.<sup>29</sup> Considering the influence of sunshine exposure on skin, we employed  
192 summary data from suprapubic skin and skin of lower leg to represent skin with and  
193 without sunshine exposure respectively.

194 In order to investigate the potential causal effect of anti-hypertension drugs (BBs and  
195 CCBs) on skin fibrotic diseases, we extracted IVs proxied the effect of increasing SBP  
196 by BB and CCB drug target gene (*ADRB1* for BB, *CACNAID*, *CACNAIF*,  
197 *CACNA2D1*, *CACNA2D2*, *CACNAIS*, *CACNB1*, *CACNB2*, *CACNB3*, *CACNB4*,  
198 *CACNG1*, and *CACNAIC* for CCB) from a previous study of MR analysis.<sup>26</sup> IV for  
199 effect of decreasing SBP by ARBs target gene (type 1 angiotensin II receptor, *ATI*)  
200 were extracted from another MR study.<sup>27</sup> All the effect data to SBP was from the  
201 meta-analysis of GWAS covered 757,601 individuals All the detailed information for  
202 exposures were listed in Table 1.

203 We employed GWAS datasets for hypertrophic scar, keloid, skin fibrosis, and scar  
204 condition (defined as a fibrotic scar that could not be differentiated as keloid or  
205 hypertrophic scar).<sup>1</sup> All the data were sourced from populations of European ancestry.  
206 Among these data for hypertrophic scar and one data of skin fibrosis and scar  
207 condition were from FinnGen, whereas data for keloid and the other data of skin  
208 fibrosis and scar condition were from UK Biobank. The detailed information for each  
209 dataset was listed in Table 2.<sup>28, 30</sup>



## 210 **MR IVs selection**

211 For IVs of multiple SNPs proxied effects of target genes (ACE, target genes for BBs,  
212 CCBs and ARBs), we selected SNPs with strong relevance ( $p < 5e-8$ ) to respective  
213 exposures. For serum ACE and serum ACE inhibition, we selected SNPs within  $\pm 100$   
214 kb of *ACE* gene. For effects of decreasing SBP by BBs and CCBs, we selected SNPs  
215 within corresponding genes or in the promoters and enhancers.<sup>26</sup> IV for ARB was  
216 selected in the drug-targeted genes associated with BP at a genome-wide significant  
217 level, which was identified in DrugBank.<sup>27</sup> Promoter and enhancer regions of  
218 corresponding drug targets were identified using the GeneHancer database in the  
219 GeneCards online platform. Subsequently, we decreased the linkage disequilibrium of  
220 the IVs by clumping on condition that genetic distance  $> 10,000$  kb and  $r^2 < 0.1$ .

221 From the GWAS data of SBP and DBP, we selected SNPs with strong relevance ( $p <$   
222  $5e-8$ ).<sup>31</sup> Then SNPs was clumped on condition that genetic distance  $> 10,000$  kb and  
223  $r^2 < 0.0001$  to eliminate linkage disequilibrium.

224 For IV of effect of serum ACE on decreasing SBP and DBP, we extracted SNPs with  
225 extensive relevance for serum ACE (data from pQTL of serum ACE,  $p < 5e-8$ ) and  
226 SBP or DBP (data from GWAS of SBP and DBP,  $p < 5e-6$ , for no SNP existed on  
227 condition that  $p < 5e-8$ ). Then we selected SNPs within  $\pm 100$  kb of ACE gene and  
228 clumped on condition that genetic distance  $> 10,000$  kb and  $r^2 < 0.1$  thereby reducing  
229 linkage disequilibrium.

230 For all IVs that will be used in MR analysis, we harmonized effects of SNPs on  
231 exposure and outcome to ensure effects relative to the same allele and exclude  
232 palindromic SNPs with intermediate allele frequencies ( $> 0.42$ ). In order to avoid  
233 potential confounding, we delete SNPs strongly related ( $p < 5e-8$ ) to outcomes (skin  
234 fibrosis, hypertrophic scar and keloid) by investigating all the SNPs on PhenoScanner  
235 database (<http://www.phenoscaner.medschl.cam.ac.uk/>) .<sup>32</sup> For the exposure of SBP,  
236 DBP and the effect on SBP/DBP by ACEi, ARB, BBs and CCBs included UKB  
237 cohorts, MR analysis with sample overlapping (outcome data from UKB cohorts) was  
238 eliminated by checking the sample sources of exposures and outcomes from different  
239 cohorts.



## 240 **Statistics**

241 R (Version 4.3.3, The R Foundation for Statistical Computing Platform, Vienna,  
242 Austria) was used to perform MR analysis and subsequent sensitivity analysis. R  
243 packages “dplyr”, “TwoSampleMR” (Version 0.6.4) and “ieugwasr”<sup>33</sup> were used to  
244 input, clump and analyze data. To explore the causal relationship of exposures and  
245 outcomes, when only one SNP existed in IV, we used method Wald ratio, while when  
246 two or more SNPs existed, we used method inverse variance weighted (IVW)  
247 including random effects IVW (IVW-MRE) and fixed effects IVW (IVW-FE).<sup>34</sup> In  
248 order to obtain more reference, we performed MR analysis by the weighted-median<sup>35</sup>,  
249 MR Egger<sup>36</sup>, simple-mode and weighted-mode method as secondary analysis  
250 methods. In MR analysis between drug targets (ACEi, ARBs, BBs and CCBs), we  
251 didn't employ the MR Egger due to the confounding effects of IVs against the  
252 INSIDE assumptions of MR Egger. Cochran's Q statistic was used to estimate the  
253 heterogeneity of IVs. If no significant heterogeneity exists ( $p_Q < 0.05$ ), we referred to  
254 results from the fixed-effects IVW MR analysis. If significant heterogeneity exists  
255 ( $p_Q < 0.05$ ), we referred to results from the random-effects IVW MR analysis. And  
256 we tested the pleiotropy of SNPs by the intercept value from the MR Egger method  
257<sup>36-38</sup>. The p value less than 0.05 indicated significant pleiotropy. If IVs of exposure  
258 were with pleiotropy, the analysis results would be excluded. F statistics were used to  
259 evaluate the risk of weak instrument bias. We used formula that  $F = (N-k-1)/k*r^2/(1-r^2)$   
260 to calculate F. Among those N is the sample size of GWAS research, k is the amount  
261 of IVs. For each IV,  $r^2$  was calculated as  $2*MAF*(1-MAF)*\beta^2$ .<sup>39</sup> If F statistics of a  
262 group of IVs was above 10, we considered that risk of weak instrument bias of IV can  
263 be ignored. An online tool (<https://sb452.shinyapps.io/power/>) was used to calculate  
264 the statistical power for MR analysis.<sup>40</sup>

265 Summary-based MR (SMR) analysis was conducted on SMR software (version 1.3.1  
266 for Windows system) developed by Zhang et al.<sup>41</sup> The software extracted SNPs  
267 within  $\pm 5$  Mb of ACE gene and with significant relevance of ACE expression in  
268 specific tissue ( $p < 5e-8$ ) from the two eQTL datasets from skin tissue. We excluded  
269 SNPs whose allele frequency below 0.01. Then we reduced LD ( $R^2 < 0.1$ ) by referring

270 to the 1000G European data. GWAS datasets of skin fibrotic diseases were used as  
271 outcomes in SMR test. Then we conducted HEIDI test to test the heterogeneity. If  
272 pHEIDI was above 0.05, we considered the IVs exhibit no significant heterogeneity.  
273 Results of SMR with significant heterogeneity were removed.

274

## 275 **Results**

### 276 **IVs selection**

277 All the F statistics of IVs were above 10 (listed in Table 1), and the explained variance  
278 of IVs were  $R^2$  of 0.025% to 39%. Detailed information including amounts of SNPs,  
279  $R^2$ , F statistics, sample size and source were shown in Table 1. All the SNPs used in  
280 MR were listed in Supplementary File 1. MR analysis whose exposure and outcome  
281 were with sample overlapping was removed.

### 282 **Effect of serum ACE or ACE inhibition and skin fibrotic diseases**

283 Our analysis of MR results revealed little causal relationship between serum ACE or  
284 ACE inhibition and skin fibrotic diseases. For single SNP (rs4343) proxied serum  
285 ACE inhibition, results of Wald ratio showed little causal effect on skin fibrotic  
286 diseases (hypertrophic scar: OR = 1.04, 95%CI 0.93-1.17,  $p = 0.46$ ; keloid: OR = 1.12,  
287 95%CI 0.83-1.52,  $p = 0.45$ ; skin fibrosis and scar condition from UKB: OR = 0.95,  
288 95%CI 0.39-2.35,  $p = 0.30$ ; skin fibrosis and scar condition from FinnGen: OR = 0.93,  
289 95%CI 0.81-1.07,  $p = 0.29$ ). For IVs composed of multiple SNPs proxied serum ACE,  
290 results of IVW showed little causal effect on skin fibrotic diseases (hypertrophic scar:  
291 OR = 0.96, 95%CI 0.86-1.07,  $p = 0.44$ ; keloid: OR = 1.03, 95%CI 0.78-1.35,  $p = 0.49$ ;  
292 skin fibrosis and scar condition from UKB: OR = 0.98, 95%CI 0.90-1.06,  $p = 0.56$ ;  
293 skin fibrosis and scar condition from FinnGen: OR = 1.11, 95%CI 0.98-1.25,  $p =$   
294 0.12). For IVs containing multiple SNPs proxied serum ACE inhibition, we found  
295 little causal effect of ACE inhibition on skin fibrotic diseases (hypertrophic scar: OR  
296 = 0.998, 95%CI 0.924-1.078,  $p = 0.96$ ; keloid: OR = 1.05, 95%CI 0.85-1.29,  $p = 0.66$ ;  
297 skin fibrosis and scar condition from UKB: OR = 0.97, 95%CI 0.91-1.03,  $p = 0.33$ ;  
298 skin fibrosis and scar condition from FinnGen: OR = 0.94, 95%CI 0.85-1.03,  $p =$   
299 0.16). Additionally, other methods also showed little causal relationship between

300 serum ACE or ACE inhibition and skin fibrotic diseases. No significant pleiotropy or  
301 heterogeneity bias was observed in these MR analysis (shown in Table 3).

### 302 **Effect of blood pressure by ACE or ACE inhibition and skin fibrotic diseases**

303 For both IVs of single SNP or multiple SNPs, results of Wald ratio and IVW-FE  
304 showed little causal association between the effect of ACE inhibition on decreasing  
305 blood pressure by on skin fibrotic diseases (hypertrophic scar, skin fibrosis and scar  
306 condition), all the p values were above 0.05 (shown in Table 4 and Figure 2). For MR  
307 analysis with IVs containing 2 SNPs, heterogeneity tests showed no significant  
308 heterogenetic bias existed in MR analysis (shown in Table 4).

### 309 **Local ACE expression and skin fibrotic diseases**

310 For skin tissue exposed to or shielded from sunshine exposure, 8 and 11 SNPs was  
311 extracted from Qtex datasets respectively to proxy local ACE expression, respectively.  
312 Notably, all the p values of SMR analysis were above 0.05 (shown in Table 5), which  
313 showed that little causal effect of ACE expression in local skin tissue on susceptibility  
314 of skin fibrotic diseases, irrespective of sunshine exposure. All the p values for HEIDI  
315 test were above 0.05 (shown in Table 5), which revealed that no significant  
316 heterogenetic bias existed.

### 317 **Systolic and diastolic blood pressure and skin fibrotic diseases**

318 Results of IVW-FE method showed significant negative causal effects of SBP on  
319 hypertrophic scar (OR = 0.69, 95% CI 0.54–0.89, p = 0.004). Similarly, results of MR  
320 Egger method, and IVW-MRE also demonstrated negative causal effect of SBP on  
321 hypertrophic scar, (MR Egger: OR = 0.480, 95% CI 0.244-0.947, p = 0.035;  
322 IVW-MRE: OR= 0.69, 95% CI 0.53-0.90, p = 0.007). These results collectively  
323 indicated that higher SBP level is causally associated with reduced risk of developing  
324 hypertrophic scar. However, IVW and other methods indicated little causal effect of  
325 DBP on hypertrophic scar. Additionally, no significant causal relationship was found  
326 between SBP or DBP and skin fibrosis and scar condition (shown in Table 6 and  
327 Figure 3). Sensitivity tests showed no obvious bias in pleiotropy and heterogeneity.

### 328 **Effect of other antihypertension drugs and skin fibrotic diseases**

329 Results of IVW-FE revealed obvious positive causal relationship between effect of

330 BBs on decreasing SBP and skin fibrosis and scar condition from FinnGen (OR =  
331 1.184, 95%CI 1.033-1.357,  $p = 0.015$ ), which indicated that BBs caused an increase  
332 of risk of skin fibrosis. Heterogeneity and pleiotropy tests for both MR analysis  
333 showed little heterogeneity and horizontal pleiotropy (shown in Table 7 and Figure 4).  
334 However, results of IVW-MRE indicated little causal relationship between effect of  
335 BBs on decreasing SBP and hypertrophic scar, for which heterogeneity test revealed  
336 significant heterogeneity of this result ( $pQ = 0.008$ ). And results of IVW-FE showed  
337 little causal relationship between effects of CCBs on decreasing SBP and hypertrophic  
338 scar or skin fibrosis and scar condition, either. Similarly, results of simple mode,  
339 weighted mode and weighted median methods for MR analysis showed similar  
340 conclusions of the little causal effect of CCBs on hypertrophic scar or skin fibrosis  
341 and scar condition. In heterogeneity and pleiotropy test, except MR between BBs and  
342 hypertrophic scar, no obvious pleiotropy and heterogeneity bias was observed. Wald  
343 ratio results found little causal relationship between blood decreasing effect of ARBs  
344 and skin fibrotic diseases (shown in Table 7 and Figure 4).

345

## 346 **Discussion**

347 Our study found little causal relationship of ACE inhibition on skin fibrotic diseases  
348 using two sample MR approach. None of serum ACE, effect of decreasing SBP/DBP  
349 by ACE inhibition or local expression of ACE gene in skin tissue was discovered  
350 significant with causal association with the occurrence of skin fibrosis and excessive  
351 scars including keloid and hypertrophic scar.

352 Nevertheless, a limited number of animal studies have suggested that ACE inhibitors  
353 can impede progression of fibrotic skin scars when administered orally or topically,  
354 indicating their potential as a therapeutic or preventive agent for such scars.<sup>11-13</sup>

355 Additionally, a few case reports,<sup>43</sup> the aforementioned retrospective study<sup>14</sup> reported  
356 the potential of ACE inhibitor drugs (Enopril and Captopril) treatments for  
357 hypertrophic scar and keloid on patients. However, the isolated case reports and  
358 retrospective study did not exclude disrupting factors. Moreover, in the retrospective  
359 study, utilization of ACE inhibitor and ARB were mixed and the dosage were not

360 unified. The aforementioned clinical trial conducted in Iran<sup>15</sup> demonstrated the  
361 effectiveness of tropical ACE inhibitor (Enopril) on decreasing the size of  
362 hypertrophic scar. However, there was a lack of large scale clinical researches covered  
363 multiple populations which provided evidence for the efficacy of ACE inhibitors in  
364 prevention or treatment of skin fibrotic scars.

365 A potential explanation for the discrepancies in the findings lies in the diverse  
366 statistical criteria employed to define the outcomes. While animal studies and clinical  
367 trials assessed the outcomes based on scar area, our research utilized a GWAS dataset  
368 with a binary outcome measure. Our findings indicated that ACE inhibition does not  
369 decrease the incidence of skin fibrotic diseases, which is not conflictive with the  
370 conclusion that ACE inhibitors have potential to diminish the size of skin fibrotic scar.  
371 To the best of our knowledge, there are no quantitative GWAS datasets available with  
372 phenotype specially focused on the size of fibrotic scar.

373 Furthermore, the regulation of fibrotic proliferation in tissue by ACE is not a  
374 unidirectional process. The products of ACE, angiotensin II, exhibits dual effects on  
375 fibrosis. When angiotensin II bind to AT1 receptor, its downstream effect is to  
376 promote fibrosis by promoting inflammation reactions such as TGF- $\beta$  synthesis.  
377 When angiotensin II binding to AT2 receptor, it can counteract inflammation reactions  
378 and suppress reactions like TGF- $\beta$  synthesis. Additionally, other downstream products  
379 of angiotensin II, such as angiotensin III and angiotensin IV, also have the potential to  
380 inhibit fibrosis.<sup>44, 45</sup>

381 It is noted that the expression of AT1 receptors in skin is comparatively low. RNA seq  
382 from normal tissue of different organs indicated that reads per kilobase per million  
383 mapped reads (RPKM) of AT1 receptor in skin is  $0.906 \pm 0.285$ , significantly lower  
384 than that in other tissues such as liver ( $21.967 \pm 2.326$ ), kidney ( $5.741 \pm 1.363$ ) and  
385 heart ( $2.423 \pm 1.416$ ).<sup>46</sup> These results prompt that the regulation effect by ACE in skin  
386 might be less pronounced than that in other tissue or organs.

387 Compared to previous studies, our research had several advantages: 1) Our study  
388 provided an exploration of the association between ACE and skin fibrotic diseases  
389 with a larger sample scale in European population. 2) Our study design had

390 advantages of eliminating confounding factors as much as possible by pleiotropy test  
391 and LD diminishing. 3) Our study investigated the causal relationship beyond merely  
392 association relationship by the method of MR analysis.

393 Our research also existed some limitations. The conclusion that ACE inhibition has  
394 little causal effect on skin fibrosis was not fully confirmed due to several limitations:  
395 1) All the MR analysis were conducted within a single population of European  
396 descent. To validate the effect of ACE inhibition on skin fibrotic diseases in other  
397 population, GWAS researches from corresponding population were required. 2) The  
398 statistical power of MR was insufficient, necessitating GWAS studies of skin fibrotic  
399 diseases with larger sample sizes. To the best of our knowledge, exposures for effect  
400 of BBs, CCBs and ARBs lacked data of pQTLs of corresponding protein targets, and  
401 the analysis primarily included the effects of decreasing blood pressure. Consequently,  
402 the direct effects of those protein targets require further research to determine whether  
403 significant causal relationship exists between their effects and skin fibrotic diseases.

404

#### 405 **Conclusion**

406 Our findings suggest that ACE inhibitors do not have a direct causal effect on the risk  
407 of skin fibrotic diseases, including hypertrophic scars and keloids. This challenges the  
408 potential of ACE inhibitors as a therapeutic option for preventing or treating these  
409 conditions. Further researches including large scale clinical trials and mechanisms  
410 researches are needed to explore the complex interplay between RAS system and skin  
411 fibrosis and the potential applications of RAS system on skin fibrotic diseases.

412

#### 413 **Reference**

- 414 1. Jeschke MG, Wood FM, Middelkoop E, et al. Scars. *Nat Rev Dis Primers*.  
415 2023;9(1):64. Published 2023 Nov 16. doi:10.1038/s41572-023-00474-x
- 416 2. Ung CY, Warwick A, Onoufriadis A, et al. Comorbidities of Keloid and  
417 Hypertrophic Scars Among Participants in UK Biobank. *JAMA Dermatol*.  
418 2023;159(2):172-181. doi:10.1001/jamadermatol.2022.5607
- 419 3. Deng CC, Hu YF, Zhu DH, et al. Single-cell RNA-seq reveals fibroblast



- 420 heterogeneity and increased mesenchymal fibroblasts in human fibrotic skin  
421 diseases. *Nat Commun.* 2021;12(1):3709. Published 2021 Jun 17.  
422 doi:10.1038/s41467-021-24110-y
- 423 4. Lopez-Sublet M, Caratti di Lanzacco L, Danser AHJ, Lambert M, Elourimi G, Persu  
424 A. Focus on increased serum angiotensin-converting enzyme level: From  
425 granulomatous diseases to genetic mutations. *Clin Biochem.* 2018;59:1-8.  
426 doi:10.1016/j.clinbiochem.2018.06.010
- 427 5. Zheng C, Huang L, Luo W, et al. Inhibition of STAT3 in tubular epithelial cells  
428 prevents kidney fibrosis and nephropathy in STZ-induced diabetic mice. *Cell Death*  
429 *Dis.* 2019;10(11):848. Published 2019 Nov 7. doi:10.1038/s41419-019-2085-0
- 430 6. Russo V, Papa AA, Williams EA, et al. ACE inhibition to slow progression of  
431 myocardial fibrosis in muscular dystrophies. *Trends Cardiovasc Med.*  
432 2018;28(5):330-337. doi:10.1016/j.tcm.2017.12.006
- 433 7. Shim KY, Eom YW, Kim MY, Kang SH, Baik SK. Role of the renin-angiotensin  
434 system in hepatic fibrosis and portal hypertension. *Korean J Intern Med.*  
435 2018;33(3):453-461. doi:10.3904/kjim.2017.317
- 436 8. Li S, Zhao W, Tao Y, Liu C. Fugan Wan alleviates hepatic fibrosis by inhibiting  
437 ACE/Ang II/AT-1R signaling pathway and enhancing ACE2/Ang 1-7/Mas signaling  
438 pathway in hepatic fibrosis rat models. *Am J Transl Res.* 2020;12(2):592-601.  
439 Published 2020 Feb 15.
- 440 9. Feng J, Huang X, Xu Q, et al. Pharmacological inhibition of the ACE/Ang-2/AT1  
441 axis alleviates mechanical ventilation-induced pulmonary fibrosis. *Int*  
442 *Immunopharmacol.* 2024;131:111855. doi:10.1016/j.intimp.2024.111855
- 443 10. Souza-Silva IM, Steckelings UM, Assersen KB. The role of vasoactive peptides in  
444 skin homeostasis-focus on adiponectin and the kallikrein-kinin system. *Am J Physiol*  
445 *Cell Physiol.* 2023;324(3):C741-C756. doi:10.1152/ajpcell.00269.2022
- 446 11. Fang QQ, Wang XF, Zhao WY, et al. The source of ACE during scar formation is  
447 from both bone marrow and skin tissue. *FASEB J.* 2018;32(9):5199-5208.  
448 doi:10.1096/fj.201701575RRR
- 449 12. Rha EY, Kim JW, Kim JH, Yoo G. Angiotensin-Converting Enzyme Inhibitor,



- 450 Captopril, Improves Scar Healing in Hypertensive Rats. *Int J Med Sci.*  
451 2021;18(4):975-983. Published 2021 Jan 1. doi:10.7150/ijms.50197
- 452 13. Demir CY, Ersoz ME, Erten R, Kocak OF, Sultanoglu Y, Basbugan Y. Comparison  
453 of Enalapril, Candesartan and Intralesional Triamcinolone in Reducing Hypertrophic  
454 Scar Development: An Experimental Study. *Aesthetic Plast Surg.* 2018;42(2):352-361.  
455 doi:10.1007/s00266-018-1073-6
- 456 14. Dow T, Selman T, Williams J, Bezuhly M. The Role of ACE-Inhibitors and ARBs  
457 in reducing hypertrophic scarring following bilateral breast reduction. *J Plast*  
458 *Reconstr Aesthet Surg.* 2023;78:1-3. doi:10.1016/j.bjps.2022.11.032
- 459 15. Mohammadi AA, Parand A, Kardeh S, Janati M, Mohammadi S. Efficacy of  
460 Topical Enalapril in Treatment of Hypertrophic Scars. *World J Plast Surg.*  
461 2018;7(3):326-331. doi:10.29252/wjps.7.3.326
- 462 16. Greif T, Alsawas M, Reid AT, et al. Targeting the Angiotensin Pathway in the  
463 Treatment of Cutaneous Fibrosis: A Systematic Review. *JID Innov.* 2023;3(6):100231.  
464 Published 2023 Sep 12. doi:10.1016/j.xjidi.2023.100231
- 465 17. Bowden J, Holmes MV. Meta-analysis and Mendelian randomization: A review.  
466 *Res Synth Methods.* Dec 2019;10(4):486-496. doi:10.1002/jrsm.1346
- 467 18. Lanlan Chen, Stephen Burgess, Shan Luo, Guoyue Lv - First release of Mendelian  
468 randomisation book in Chinese: *eGastroenterology* 2023;1:e100043.
- 469 19. Noishiki C, Hayasaka Y, Yoshida R, Ogawa R. Over 90% of Childhood BCG  
470 Vaccine-Induced Keloids in Japan Occur in Women. *Dermatol Ther (Heidelb).*  
471 2023;13(5):1137-1147. doi:10.1007/s13555-023-00916-0
- 472 20. Arima J, Huang C, Rosner B, Akaishi S, Ogawa R. Hypertension: a systemic key  
473 to understanding local keloid severity. *Wound Repair Regen.* 2015;23(2):213-221.  
474 doi:10.1111/wrr.12277
- 475 21. Lanlan Chen, Guoyue Lv - New horizons of human genetics in digestive  
476 diseases: *eGastroenterology* 2023;1:e100029.
- 477 22. Eldjarn GH, Ferkingstad E, Lund SH, et al. Large-scale plasma proteomics  
478 comparisons through genetics and disease associations. *Nature.*  
479 2023;622(7982):348-358. doi:10.1038/s41586-023-06563-x

- 480 23. Abdollahi MR, Huang S, Rodriguez S, et al. Homogeneous assay of rs4343, an  
481 ACE I/D proxy, and an analysis in the British Women's Heart and Health Study  
482 (BWHHS). *Dis Markers*. 2008;24(1):11-17. doi:10.1155/2008/813679
- 483 24. Yarmolinsky J, Díez-Obrero V, Richardson TG, et al. Genetically proxied  
484 therapeutic inhibition of antihypertensive drug targets and risk of common cancers: A  
485 mendelian randomization analysis. *PLoS Med*. 2022;19(2):e1003897. Published 2022  
486 Feb 3. doi:10.1371/journal.pmed.1003897
- 487 25. Kehoe PG, Katzov H, Andreassen N, et al. Common variants of ACE contribute to  
488 variable age-at-onset of Alzheimer's disease. *Hum Genet*. 2004;114(5):478-483.  
489 doi:10.1007/s00439-004-1093-y
- 490 26. Gill D, Georgakis MK, Koskeridis F, et al. Use of Genetic Variants Related to  
491 Antihypertensive Drugs to Inform on Efficacy and Side Effects. *Circulation*.  
492 2019;140(4):270-279. doi:10.1161/CIRCULATIONAHA.118.038814
- 493 27. Hanchen Liu, Xiaoxi Zhang, Yu Zhou, Thanh N Nguyen, Lei Zhang, Pengfei Xing,  
494 Zifu Li, Hongjian Shen, Yongxin Zhang, Weilong Hua, Hongye Xu, Xuan Zhu, Lei  
495 Chen, Qiao Zuo, Rui Zhao, Qiang Li, Dongwei Dai, Yongwei Zhang, Yi Xu, Qinghai  
496 Huang, Jianmin Liu, Pengfei Yang, Association between blood pressure and different  
497 antihypertensive drugs with outcome after ischemic stroke: A Mendelian  
498 randomization study. *International Journal of Stroke*. 2023; 18(10): 1247-1254, doi:  
499 10.1177/17474930231185695
- 500 28. Loh PR, Kichaev G, Gazal S, Schoech AP, Price AL. Mixed-model association for  
501 biobank-scale datasets. *Nat Genet*. 2018;50(7):906-908.  
502 doi:10.1038/s41588-018-0144-6
- 503 29. GTEx Consortium. The GTEx Consortium atlas of genetic regulatory effects  
504 across human tissues. *Science*. 2020;369(6509):1318-1330.  
505 doi:10.1126/science.aaz1776
- 506 30. Kurki MI, Karjalainen J, Palta P, et al. FinnGen provides genetic insights from a  
507 well-phenotyped isolated population [published correction appears in Nature. 2023  
508 Feb 24;:]. *Nature*. 2023;613(7944):508-518. doi:10.1038/s41586-022-05473-8
- 509 31. Fairley S, Lowy-Gallego E, Perry E, Flicek P. The International Genome Sample

- 510 Resource (IGSR) collection of open human genomic variation resources. *Nucleic*  
511 *Acids Res.* 2020;48(D1):D941-D947. doi:10.1093/nar/gkz836
- 512 32. Yao S, Zhang M, Dong SS, et al. Bidirectional two-sample Mendelian  
513 randomization analysis identifies causal associations between relative carbohydrate  
514 intake and depression. *Nat Hum Behav.* 2022;6(11):1569-1576.  
515 doi:10.1038/s41562-022-01412-9
- 516 33. Burgess S, Butterworth A, Thompson SG. Mendelian randomization analysis with  
517 multiple genetic variants using summarized data. *Genet Epidemiol.* Nov  
518 2013;37(7):658-65. doi:10.1002/gepi.21758
- 519 34. Hemani G, Zheng J, Elsworth B, et al. The MR-Base platform supports systematic  
520 causal inference across the human phenome. *Elife.* 2018;7:e34408. Published 2018  
521 May 30. doi:10.7554/eLife.34408
- 522 35. Bowden J, Davey Smith G, Haycock PC, Burgess S. Consistent Estimation in  
523 Mendelian Randomization with Some Invalid Instruments Using a Weighted Median  
524 Estimator. *Genet Epidemiol.* May 2016;40(4):304-14. doi:10.1002/gepi.21965
- 525 36. Bowden J, Davey Smith G, Burgess S. Mendelian randomization with invalid  
526 instruments: effect estimation and bias detection through Egger regression. *Int J*  
527 *Epidemiol.* Apr 2015;44(2):512-25. doi:10.1093/ije/dyv080
- 528 37. Yao S, Zhang M, Dong SS, et al. Bidirectional two-sample Mendelian  
529 randomization analysis identifies causal associations between relative carbohydrate  
530 intake and depression. *Nat Hum Behav.* 2022;6(11):1569-1576.  
531 doi:10.1038/s41562-022-01412-9
- 532 38. Stephen Burgess, H el ene Toin et Cronj e - Incorporating biological and clinical  
533 insights into variant choice for Mendelian randomisation: examples and  
534 principles: *eGastroenterology* 2024;2:e100042.
- 535 39. Burgess S, Thompson SG. Avoiding bias from weak instruments in Mendelian  
536 randomization studies. *Int J Epidemiol.* Jun 2011;40(3):755-64.  
537 doi:10.1093/ije/dyr036
- 538 40. Burgess S. Sample size and power calculations in Mendelian randomization with a  
539 single instrumental variable and a binary outcome. *Int J Epidemiol.* Jun

- 540 2014;43(3):922-9. doi:10.1093/ije/dyu005
- 541 41. Zhu Z, Zhang F, Hu H, et al. Integration of summary data from GWAS and eQTL  
542 studies predicts complex trait gene targets. *Nat Genet.* 2016; 48 (5):481-487.  
543 doi:10.1038/ng.3538
- 544 42. Hedayatyanfard K, Ziai SA, Niazi F, Habibi I, Habibi B, Moravvej H. Losartan  
545 ointment relieves hypertrophic scars and keloid: A pilot study. *Wound Repair Regen.*  
546 2018; 26 (4):340-343. doi:10.1111/wrr.12648
- 547 43. Ardekani GS, Aghaie S, Nemati MH, Handjani F, Kasraee B. Treatment of a  
548 postburn keloid scar with topical captopril: report of the first case [published  
549 correction appears in *Plast Reconstr Surg.* 2009 Jun;123(6):1898. Aghaie, Shahin  
550 [corrected to Aghaei, Shahin]]. *Plast Reconstr Surg.* 2009; 123 (3):112e-113e.  
551 doi:10.1097/PRS.0b013e31819a34db
- 552 44. Silva IMS, Assersen KB, Willadsen NN, Jepsen J, Artuc M, Steckelings UM. The  
553 role of the renin-angiotensin system in skin physiology and pathophysiology. *Exp*  
554 *Dermatol.* 2020;29(9):891-901. doi:10.1111/exd.14159
- 555 45. Hedayatyanfard K, Haddadi NS, Ziai SA, et al. The renin-angiotensin system in  
556 cutaneous hypertrophic scar and keloid formation. *Exp Dermatol.* 2020;29(9):902-909.  
557 doi:10.1111/exd.14154
- 558 46. Fagerberg L, Hallström BM, Oksvold P, et al. Analysis of the human  
559 tissue-specific expression by genome-wide integration of transcriptomics and  
560 antibody-based proteomics. *Mol Cell Proteomics.* 2014; 13 (2):397-406.  
561 doi:10.1074/mcp.M113.035600

Table 1 Detailed Information for Exposure GWAS Data

| IV             | Exposur<br>es                          | NSN<br>P | R <sup>2</sup> | F                 | Sampl<br>e size | Populatio<br>n | Sourc<br>e                           |
|----------------|----------------------------------------|----------|----------------|-------------------|-----------------|----------------|--------------------------------------|
| serum_AC<br>E  | Serum<br>ACE                           | 30       | 0.24           | 376.28            | 35275           | EUR            | pQTL<br>of<br>Iceland<br>corhor<br>t |
| ACE_SBP        | ACE<br>effect on<br>SBP                | 2        | 6.47e-0<br>5   | 30.38             | 46976<br>7      | EUR            | UKB                                  |
| ACE_DBP        | ACE<br>effect on<br>DBP                | 2        | 6.43e-0<br>5   | 31.53             | 49046<br>9      | EUR            | UKB                                  |
| serum_AC<br>Ei | Serum<br>ACE<br>inhibitio<br>n         | 14       | 0.34-0.3<br>9  | 2156.5-2594<br>.9 | 4174            | EUR            | pQTL<br>of<br>GER<br>A               |
| ACEi_SBP       | ACE<br>inhibitio<br>n effect<br>on SBP | 2        | 0.28           | 759.90            | 75760<br>1      | EUR            | UKB<br>and<br>ICBP                   |
| SBP            | SBP                                    | 293      | 4.37e-0<br>2   | 76.66             | 46976<br>7      | EUR            | UKB                                  |
| DBP            | DBP                                    | 283      | 4.56e-0<br>2   | 85.79             | 49046<br>9      | EUR            | UKB                                  |
| Rs4291         | ACE<br>inhibitio                       | 1        | 3.69e-0<br>4   | 276.00            | 74528<br>0      | EUR            | UKB<br>and                           |

|     |    |                   |          |        |       |     |              |
|-----|----|-------------------|----------|--------|-------|-----|--------------|
|     | n  | effect            |          |        |       |     | ICBP         |
|     |    | on SBP            |          |        |       |     |              |
| BB  | 6  | BB effect on SBP  | 2.54e-04 | 188.00 | 73800 | EUR | UKB and ICBP |
| CCB | 24 | CCB effect on SBP | 5.26e-03 | 176.32 | 73650 | EUR | UKB and ICBP |
| ARB | 1  | ARB effect on SBP | 3.99e-05 | 30.25  | 75760 | EUR | UKB and ICBP |

---

GERA: Genetic Epidemiology Research on Adult Health and Aging

ICBP: International Consortium of Blood Pressure-Genome Wide Association Studies

Table 2 Detailed Information for Outcome GWAS Data

| Phenotype                        | UKB-id | Sample size | Ncase | Ncontrol | Source  | Population |
|----------------------------------|--------|-------------|-------|----------|---------|------------|
| Hypertrophic scar                | -      | 323,197     | 1294  | 321903   | Finngen | EUR        |
| Keloid                           | 701.4  | 404,486     | 216   | 402139   | UKB     | EUR        |
| Skin fibrosis and scar condition | 701.2  | 404,486     | 2345  | 402141   | UKB     | EUR        |
| Skin fibrosis and scar condition | -      | 322,794     | 891   | 321903   | Finngen | EUR        |



Table 3 Serum ACE and Skin Fibrotic Diseases

| IV     | Exposure             | Outcome                                    | Pleiotropy | Heterogeneity | Method     | Beta    | SE     | P-value | OR (95%CI)             |
|--------|----------------------|--------------------------------------------|------------|---------------|------------|---------|--------|---------|------------------------|
| rs4343 | Serum ACE inhibition | Hypertrophic Scar (FinnGen)                | NA         | NA            | Wald ratio | 0.0436  | 0.0591 | 0.4607  | 1.0446 (0.9303-1.1729) |
| rs4343 | Serum ACE inhibition | Keloid (UKB)                               | NA         | NA            | Wald ratio | 0.1159  | 0.1540 | 0.4517  | 1.1229 (0.8304-1.5184) |
| rs4343 | Serum ACE inhibition | Skin Fibrosis and Scar Condition (UKB)     | NA         | NA            | Wald ratio | -0.0476 | 0.0460 | 0.3009  | 0.9535 (0.8712-1.0435) |
| rs4343 | Serum ACE inhibition | Skin Fibrosis and Scar Condition (FinnGen) | NA         | NA            | Wald ratio | -0.0747 | 0.0708 | 0.2916  | 0.928 (0.8077-1.0662)  |

|            |           | Hypertrophic Scar (FinnGen) |        |          |            |      |     |      |           |
|------------|-----------|-----------------------------|--------|----------|------------|------|-----|------|-----------|
| serum_ ACE | Serum ACE | Hypertrophic Scar (FinnGen) | 0.8122 | 0.4179   | IVW-       | -0.0 | 0.0 | 0.44 | 0.9596    |
|            |           |                             |        |          | FE         | 412  | 538 | 36   | (0.8636-  |
|            |           |                             |        |          |            |      |     |      | 1.0663)   |
|            |           |                             |        |          | IVW-       | -0.0 | 0.0 | 0.45 | 0.9596    |
|            |           |                             |        |          | MRE        | 412  | 546 | 07   | (0.8622-  |
|            |           |                             |        |          |            |      |     |      | 1.0681)   |
|            |           |                             |        |          | Weighted   |      |     |      | 1.026     |
|            |           |                             |        |          | Median     | 56   | 765 | 75   | (0.8831-  |
|            |           |                             |        |          |            |      |     |      | 1.192)    |
|            |           |                             |        |          | Simplified | 0.06 | 0.1 | 0.58 | 1.072     |
| Mode       | 95        | 245                         | 08     | (0.8399- |            |      |     |      |           |
|            |           |                             |        | 1.3682)  |            |      |     |      |           |
| Weighted   |           |                             |        | 1.0147   |            |      |     |      |           |
| Mode       | 0.01      | 0.0                         | 0.84   | (0.8792- |            |      |     |      |           |
|            | 46        | 732                         | 30     | 1.1712)  |            |      |     |      |           |
| serum_ ACE | Serum ACE | Keloid (UKB)                | 0.8346 | 0.9486   | IVW-       | 0.02 | 0.1 | 0.84 | 1.0276    |
|            |           |                             |        |          | FE         | 72   | 387 | 43   | (0.783-1. |
|            |           |                             |        |          |            |      |     |      | 3487)     |
|            |           |                             |        |          | IVW-       | 0.02 | 0.1 | 0.80 | 1.0276    |
|            |           |                             |        |          | MRE        | 72   | 086 | 20   | (0.8306-  |
|            |           |                             |        |          |            |      |     |      | 1.2714)   |
|            |           |                             |        |          | Weighted   |      |     |      | 1.1397    |
|            |           |                             |        |          | Median     | 0.13 | 0.1 | 0.49 | (0.7855-  |
|            |           |                             |        |          |            | 08   | 899 | 09   | 1.6536)   |
|            |           |                             |        |          | Simplified | -0.1 | 0.3 | 0.71 | 0.881     |



|                |                                    | Condi<br>tion<br>(FinnG<br>en)            |        |                            |             |             |            |                               |                               |
|----------------|------------------------------------|-------------------------------------------|--------|----------------------------|-------------|-------------|------------|-------------------------------|-------------------------------|
|                |                                    |                                           |        | IVW-                       | 0.10        | 0.0         | 0.05       | 1.1055                        |                               |
|                |                                    |                                           |        | MRE                        | 03          | 518         | 26         | (0.9989-<br>1.2236)           |                               |
|                |                                    |                                           |        | Weig<br>hted               | 0.05        | 0.0         | 0.50       | 1.0589                        |                               |
|                |                                    |                                           |        | Media<br>n                 | 72          | 864         | 78         | (0.8939-<br>1.2544)           |                               |
|                |                                    |                                           |        | Simpl<br>e<br>Mode         | -0.0<br>115 | 0.1<br>317  | 0.93<br>12 | 0.9886<br>(0.7637-<br>1.2797) |                               |
|                |                                    |                                           |        | Weig<br>hted<br>Mode       | 0.04<br>13  | 0.0<br>838  | 0.62<br>56 | 1.0422<br>(0.8844-<br>1.2282) |                               |
| serum_<br>ACEi | Seru<br>m<br>ACE<br>inhibi<br>tion | Hypert<br>rophic<br>Scar<br>(FinnG<br>en) | 0.6886 | 0.4511                     | IVW-<br>FE  | -0.0<br>019 | 0.0<br>394 | 0.96<br>07                    | 0.9981<br>(0.9238-<br>1.0783) |
|                |                                    |                                           |        |                            | IVW-<br>MRE | -0.0<br>019 | 0.0<br>393 | 0.96<br>06                    | 0.9981<br>(0.924-1.<br>078)   |
|                |                                    |                                           |        | Weig<br>hted<br>Media<br>n | -0.0<br>199 | 0.0<br>504  | 0.69<br>32 | 0.9803<br>(0.8881-<br>1.0821) |                               |

|        |        |         |        |         |       |      |     |      |          |
|--------|--------|---------|--------|---------|-------|------|-----|------|----------|
|        |        |         |        |         | Simpl |      |     |      | 0.8812   |
|        |        |         |        |         | e     | -0.1 | 0.0 | 0.17 | (0.7428- |
|        |        |         |        |         | Mode  | 264  | 872 | 26   | 1.0454)  |
|        |        |         |        |         | Weig  |      |     |      | 1.0142   |
|        |        |         |        |         | hted  | 0.01 | 0.0 | 0.80 | (0.9097- |
|        |        |         |        |         | Mode  | 41   | 555 | 37   | 1.1307)  |
|        | Seru   |         |        |         |       |      |     |      |          |
|        | m      |         |        |         |       |      |     |      | 1.0476   |
| serum_ | ACE    | Keloid  | 0.6304 | 0.6612  | IVW-  | 0.04 | 0.1 | 0.66 | (0.8503- |
| ACEi   | inhibi | (UKB)   |        |         | FE    | 65   | 064 | 24   | 1.2906)  |
|        | tion   |         |        |         |       |      |     |      |          |
|        |        |         |        |         | IVW-  | 0.04 | 0.0 | 0.62 | 1.0476   |
|        |        |         |        |         | MRE   | 65   | 952 | 54   | (0.8693- |
|        |        |         |        |         |       |      |     |      | 1.2625)  |
|        |        |         |        |         | Weig  |      |     |      | 1.1189   |
|        |        |         |        |         | hted  | 0.11 | 0.1 | 0.39 | (0.8619- |
|        |        |         |        |         | Media | 24   | 331 | 87   | 1.4525)  |
|        |        |         |        |         | n     |      |     |      |          |
|        |        |         |        |         | Simpl |      |     |      | 1.0277   |
|        |        |         |        |         | e     | 0.02 | 0.2 | 0.90 | (0.6535- |
|        |        |         |        |         | Mode  | 73   | 310 | 77   | 1.6163)  |
|        |        |         |        |         | Weig  |      |     |      | 1.1197   |
|        |        |         |        |         | hted  | 0.11 | 0.1 | 0.45 | (0.8417- |
|        |        |         |        |         | Mode  | 30   | 456 | 14   | 1.4894)  |
|        | Seru   | Skin    |        |         |       |      |     |      |          |
|        | m      | Fibrosi |        |         |       |      |     |      | 0.9693   |
| serum_ | ACE    | s and   | 0.6263 | 0.13664 | IVW-  | -0.0 | 0.0 | 0.33 | (0.9102- |
| ACEi   | inhibi | Scar    | 33556  | 7881    | FE    | 311  | 321 | 21   | 1.0323)  |
|        | tion   | Condi   |        |         |       |      |     |      |          |



|       | n   |      |     |                     |
|-------|-----|------|-----|---------------------|
| Simpl |     | 0.01 | 0.1 | 0.89                |
| e     | 34  | 012  | 70  | 1.0135              |
| Mode  |     |      |     | (0.8311-<br>1.2358) |
| Weig  |     | -0.0 | 0.0 | 0.51                |
| hted  | 428 | 640  | 67  | 0.9581              |
| Mode  |     |      |     | (0.8452-<br>1.0862) |

---



Table 4 ACE Effect on Blood Pressure and Skin Fibrotic Diseases

| IV      | Exposure                        | Outcome                                    | Pleiotropy | Heterogeneity | Method     | Beta   | SE     | P-value | OR (95%CI)                    |
|---------|---------------------------------|--------------------------------------------|------------|---------------|------------|--------|--------|---------|-------------------------------|
| rs4291  | Effect of ACE inhibition on SBP | Hypertrophic Scar (FinnGen)                | NA         | NA            | Wald ratio | 0.0717 | 0.1338 | 0.5922  | 1.0743 (0.8264-1.3965)        |
| rs4291  | Effect of ACE inhibition on SBP | Skin Fibrosis and Scar Condition (FinnGen) | NA         | NA            | Wald ratio | 0.1193 | 0.1604 | 0.4568  | 1.1268 (0.8228-1.5429)        |
| ACE_SBP | Effect of ACE inhibition on SBP | Hypertrophic Scar (FinnGen)                | NA         | NA            | Wald ratio | 1.7460 | 3.1452 | 0.5788  | 5.7315 (0.0121-2725.9807)     |
| ACE_SBP | Effect of ACE inhibition on SBP | Skin Fibrosis and Scar Condition           | NA         | NA            | Wald ratio | 5.1906 | 3.7723 | 0.1688  | 179.5763 (0.1105-291939.3434) |

|              |                             |                                      |    |        |               |            |            |            |                          |
|--------------|-----------------------------|--------------------------------------|----|--------|---------------|------------|------------|------------|--------------------------|
|              |                             | (FinnG<br>en)                        |    |        |               |            |            |            |                          |
|              | Effec<br>t of               | Hypert<br>rophic                     |    |        |               |            |            |            | 5.7621                   |
| ACE_<br>DBP  | ACE<br>on                   | Scar<br>(FinnG<br>en)                | NA | NA     | Wald<br>ratio | 1.7<br>513 | 3.1<br>548 | 0.57<br>88 | (0.0119-279<br>2.3439)   |
|              |                             | Skin                                 |    |        |               |            |            |            |                          |
|              | Effec<br>t of               | Fibrosi<br>s and                     |    |        |               |            |            |            | 182.433                  |
| ACE_<br>DBP  | ACE<br>on                   | Scar<br>Condi<br>on<br>(FinnG<br>en) | NA | NA     | Wald<br>ratio | 5.2<br>064 | 3.7<br>838 | 0.16<br>88 | (0.1097-303<br>326.6091) |
|              | Effec<br>t of               | Hypert<br>rophic                     |    |        |               |            |            |            | 1.0948                   |
| ACEi<br>_SBP | ACE<br>inhib<br>ition<br>on | Scar<br>(FinnG<br>en)                | NA | 0.8594 | IVW-<br>FE    | 0.0<br>905 | 0.1<br>192 | 0.44<br>75 | (0.8667-1.3<br>829)      |
|              |                             | SBP                                  |    |        |               |            |            |            | 1.0948                   |
|              |                             |                                      |    |        | IVW-<br>MRE   | 0.0<br>905 | 0.0<br>211 | 0.00<br>00 | (1.0504-1.1<br>41)       |
|              | Effec<br>t of               | Skin<br>Fibrosi<br>s and             |    |        |               |            |            |            | 1.2292                   |
| ACEi<br>_SBP | ACE<br>inhib                | Scar                                 | NA | 0.4739 | IVW-<br>FE    | 0.2<br>063 | 0.1<br>429 | 0.14<br>88 | (0.9289-1.6<br>265)      |

ition Condi  
on on  
SBP (FinnG  
en)

|      |     |     |      |             |
|------|-----|-----|------|-------------|
|      |     |     |      | 1.2292      |
| IVW- | 0.2 | 0.1 | 0.04 | (1.0057-1.5 |
| MRE  | 063 | 023 | 38   | 022)        |

---

Table 5 ACE Expression in Local Skin Tissue and Skin Fibrotic Diseases

| Tissue                 | Outcome                                                   | Gene    | Probe<br>_bp | Top<br>snp | A<br>1 | A<br>2 | Fr<br>eq | B_s<br>mr | Se_<br>smr | P_s<br>mr | P_h<br>eidi | NSNP_<br>heidi |
|------------------------|-----------------------------------------------------------|---------|--------------|------------|--------|--------|----------|-----------|------------|-----------|-------------|----------------|
| Supra<br>pubic<br>skin | Hypetr<br>ophic<br>scar                                   | A<br>CE | 6155<br>4422 | Rs4<br>311 | C      | T      | 0.<br>50 | -0.1<br>3 | 0.23       | 0.5<br>8  | 0.77        | 8              |
| Supra<br>pubic<br>skin | Keloid                                                    | A<br>CE | 6155<br>4422 | Rs4<br>311 | C      | T      | 0.<br>50 | -0.6<br>3 | 0.62       | 0.3<br>1  | 0.95        | 8              |
| Supra<br>pubic<br>skin | and<br>scar<br>conditi<br>on<br>(UKB)<br>Skin<br>fibrosis | A<br>CE | 6155<br>4422 | Rs4<br>311 | C      | T      | 0.<br>50 | 0.0<br>6  | 0.18       | 0.7<br>6  | 0.47        | 8              |
| Supra<br>pubic<br>skin | and<br>scar<br>conditi<br>on<br>(Finng<br>en)             | A<br>CE | 6155<br>4422 | Rs4<br>311 | C      | T      | 0.<br>50 | 0.1<br>8  | 0.28       | 0.5<br>3  | 0.88        | 8              |
| Leg                    | Hypetr<br>ophic<br>scar                                   | A<br>CE | 6155<br>4422 | Rs4<br>292 | T      | C      | 0.<br>63 | 0.1<br>4  | 0.21       | 0.5<br>0  | 0.22        | 11             |
| Leg                    | Keloid                                                    | A<br>CE | 6155<br>4422 | Rs4<br>292 | T      | C      | 0.<br>63 | -0.3<br>6 | 0.55       | 0.5<br>2  | 1.00        | 11             |



Table 6 Blood Pressure and Skin Fibrotic Diseases

| IV  | Exposure | Outcome                                    | Pleiotropy | Heterogeneity | Method   | Beta | SE  | P-value | OR (95%CI)      |
|-----|----------|--------------------------------------------|------------|---------------|----------|------|-----|---------|-----------------|
| SBP | SBP      | Hypertrophic Scar (FinnGen)                | 0.2526     | 0.0588        | IVW-     | -0.3 | 0.1 | 0.00    | 0.6925          |
|     |          |                                            |            |               | FE       | 675  | 269 | 38      | (0.54-0.881)    |
|     |          |                                            |            |               | IVW-     | -0.3 | 0.1 | 0.00    | 0.6925          |
|     |          |                                            |            |               | MRE      | 675  | 353 | 66      | (0.5312-0.9028) |
|     |          |                                            |            |               | Weighted | -0.3 | 0.2 | 0.08    | 0.6981          |
|     |          |                                            |            |               | Median   | 594  | 090 | 55      | (0.4635-1.0515) |
| SBP | SBP      | Skin Fibrosis and Scar Condition (FinnGen) | 0.1628     | 0.6433        | Simple   | -0.6 | 0.6 | 0.32    | 0.5372          |
|     |          |                                            |            |               | Mode     | 215  | 273 | 27      | (0.1571-1.8368) |
|     |          |                                            |            |               | Weighted | -0.4 | 0.4 | 0.31    | 0.6254          |
|     |          |                                            |            |               | Mode     | 694  | 676 | 63      | (0.2501-1.5637) |
|     |          |                                            |            |               | IVW-     | -0.1 | 0.1 | 0.46    | 0.8953          |
|     |          |                                            |            |               | FE       | 106  | 519 | 65      | (0.6647-1.2058) |







Table 7 Other Antihypertension Drugs' Effect on Blood Pressure and Skin Fibrotic Diseases

| IV          | Exposure              | Outcome                               | Pleiotropy | Heterogeneity | Method     | Beta    | SE     | P-value | OR (95%CI) |
|-------------|-----------------------|---------------------------------------|------------|---------------|------------|---------|--------|---------|------------|
| A<br>R<br>B | Effect of ARBs on SBP | Hypertrrophic Scar (FinnGen)          | NA         | NA            | Wald ratio | -0.1505 | 0.2000 | 0.4940  | 0.8603     |
|             |                       |                                       |            |               |            |         |        |         | (0.5589-1  |
|             |                       |                                       |            |               |            |         |        |         | .3241)     |
| A<br>R<br>B | Effect of ARBs on SBP | Fibrosis and Scar Condition (FinnGen) | NA         | NA            | Wald ratio | 0.3220  | 0.2638 | 0.2222  | 1.3799     |
|             |                       |                                       |            |               |            |         |        |         | (0.8228-2  |
|             |                       |                                       |            |               |            |         |        |         | .3142)     |
| B<br>B      | Effect of BBs on SBP  | Hypertrrophic Scar (FinnGen)          | 0.4511     | 0.0085        | IVW-FE     | 0.0627  | 0.0583 | 0.2821  | 1.0648     |
|             |                       |                                       |            |               |            |         |        |         | (0.9497-1  |
|             |                       |                                       |            |               |            |         |        |         | .1938)     |
|             |                       |                                       |            |               | IVW-       | 0.06    | 0.1    | 0.54    | 1.0648     |
|             |                       |                                       |            |               | MRE        | 27      | 027    | 12      | (0.8706-1  |
|             |                       |                                       |            |               |            |         |        |         | .3022)     |
|             |                       |                                       |            |               | Weighted   | 0.01    | 0.0    | 0.84    | 1.0152     |
|             |                       |                                       |            |               | Median     | 50      | 763    | 37      | (0.8741-1  |
|             |                       |                                       |            |               | n          |         |        |         | .179)      |

|   |        |          |        |        |        |      |     |      |           |
|---|--------|----------|--------|--------|--------|------|-----|------|-----------|
|   |        |          |        |        | Simple | 0.05 | 0.1 | 0.65 | 1.0514    |
|   |        |          |        |        | Mode   | 01   | 072 | 98   | (0.8522-1 |
|   |        |          |        |        |        |      |     |      | .2971)    |
|   |        |          |        |        | Weigh  |      |     |      | 0.9777    |
|   |        |          |        |        | ted    | -0.0 | 0.0 | 0.79 | (0.8321-1 |
|   |        |          |        |        | Mode   | 226  | 822 | 47   | .1487)    |
|   |        | Skin     |        |        |        |      |     |      |           |
|   |        | Fibrosis |        |        |        |      |     |      |           |
|   | Effect | and      |        |        |        |      |     |      |           |
|   | of     | Scar     |        |        | IVW-   | 0.16 | 0.0 | 0.01 | 1.1839    |
| B | BBs    | Condi    | 0.7791 | 0.6579 | FE     | 88   | 696 | 53   | (1.033-1. |
| B | on     | on       |        |        |        |      |     |      | 3569)     |
|   | SBP    | (FinnGe  |        |        |        |      |     |      |           |
|   |        | n)       |        |        |        |      |     |      |           |
|   |        |          |        |        | IVW-   | 0.16 | 0.0 | 0.00 | 1.1839    |
|   |        |          |        |        | MRE    | 88   | 563 | 27   | (1.0602-1 |
|   |        |          |        |        |        |      |     |      | .3221)    |
|   |        |          |        |        | Weigh  |      |     |      | 1.1622    |
|   |        |          |        |        | ted    | 0.15 | 0.0 | 0.06 | (0.9883-1 |
|   |        |          |        |        | Media  | 03   | 827 | 91   | .3667)    |
|   |        |          |        |        | n      |      |     |      |           |
|   |        |          |        |        | Simple | 0.18 | 0.1 | 0.21 | 1.1982    |
|   |        |          |        |        | Mode   | 08   | 287 | 91   | (0.931-1. |
|   |        |          |        |        |        |      |     |      | 5421)     |
|   |        |          |        |        | Weigh  |      |     |      | 1.1614    |
|   |        |          |        |        | ted    | 0.14 | 0.0 | 0.18 | (0.9614-1 |
|   |        |          |        |        | Mode   | 96   | 964 | 15   | .4031)    |
| C | Effect | Hypertr  |        |        | IVW-   | 0.05 | 0.0 | 0.06 | 1.0605    |
| C | of     | ophic    | 0.3079 | 0.5962 | FE     | 88   | 322 | 84   | (0.9956-1 |

|   |        |          |        |        |        |      |     |      |           |
|---|--------|----------|--------|--------|--------|------|-----|------|-----------|
| B | CCBs   | Scar     |        |        |        |      |     |      | .1297)    |
|   | on     | (FinnGe  |        |        |        |      |     |      |           |
|   | SBP    | n)       |        |        |        |      |     |      |           |
|   |        |          |        |        | IVW-   | 0.05 | 0.0 | 0.05 | 1.0605    |
|   |        |          |        |        | MRE    | 88   | 305 | 43   | (0.9989-1 |
|   |        |          |        |        |        |      |     |      | .1259)    |
|   |        |          |        |        | Weigh  |      |     |      |           |
|   |        |          |        |        | ted    | 0.06 | 0.0 | 0.12 | 1.0717    |
|   |        |          |        |        | Media  | 93   | 447 | 12   | (0.9818-1 |
|   |        |          |        |        | n      |      |     |      | .1699)    |
|   |        |          |        |        | Simple | 0.11 | 0.0 | 0.18 | 1.1168    |
|   |        |          |        |        | Mode   | 05   | 813 | 84   | (0.9524-1 |
|   |        |          |        |        |        |      |     |      | .3097)    |
|   |        |          |        |        | Weigh  |      |     |      | 1.0829    |
|   |        |          |        |        | ted    | 0.07 | 0.0 | 0.21 | (0.9574-1 |
|   |        |          |        |        | Mode   | 96   | 628 | 88   | .2248)    |
|   |        | Skin     |        |        |        |      |     |      |           |
|   |        | Fibrosis |        |        |        |      |     |      |           |
|   | Effect | and      |        |        |        |      |     |      |           |
| C | of     | Scar     |        |        | IVW-   | -0.0 | 0.0 | 0.14 | 0.946     |
| C | CCBs   | Condi    | 0.7805 | 0.3859 | FE     | 556  | 386 | 99   | (0.8771-1 |
| B | on     | on       |        |        |        |      |     |      | .0203)    |
|   | SBP    | (FinnGe  |        |        |        |      |     |      |           |
|   |        | n)       |        |        |        |      |     |      |           |
|   |        |          |        |        | IVW-   | -0.0 | 0.0 | 0.16 | 0.946     |
|   |        |          |        |        | MRE    | 556  | 397 | 17   | (0.8751-1 |
|   |        |          |        |        |        |      |     |      | .0225)    |
|   |        |          |        |        | Weigh  | -0.0 | 0.0 | 0.23 | 0.937     |
|   |        |          |        |        | ted    | 651  | 549 | 54   | (0.8415-1 |

|        |      |     |      |           |
|--------|------|-----|------|-----------|
| Media  |      |     |      | .0433)    |
| n      |      |     |      |           |
| Simple | -0.0 | 0.0 | 0.51 | 0.9456    |
| Mode   | 559  | 850 | 81   | (0.8005-1 |
|        |      |     |      | .1171)    |
| Weigh  |      |     |      | 0.9327    |
| ted    | -0.0 | 0.0 | 0.28 | (0.8247-1 |
| Mode   | 696  | 628 | 00   | .0549)    |

---

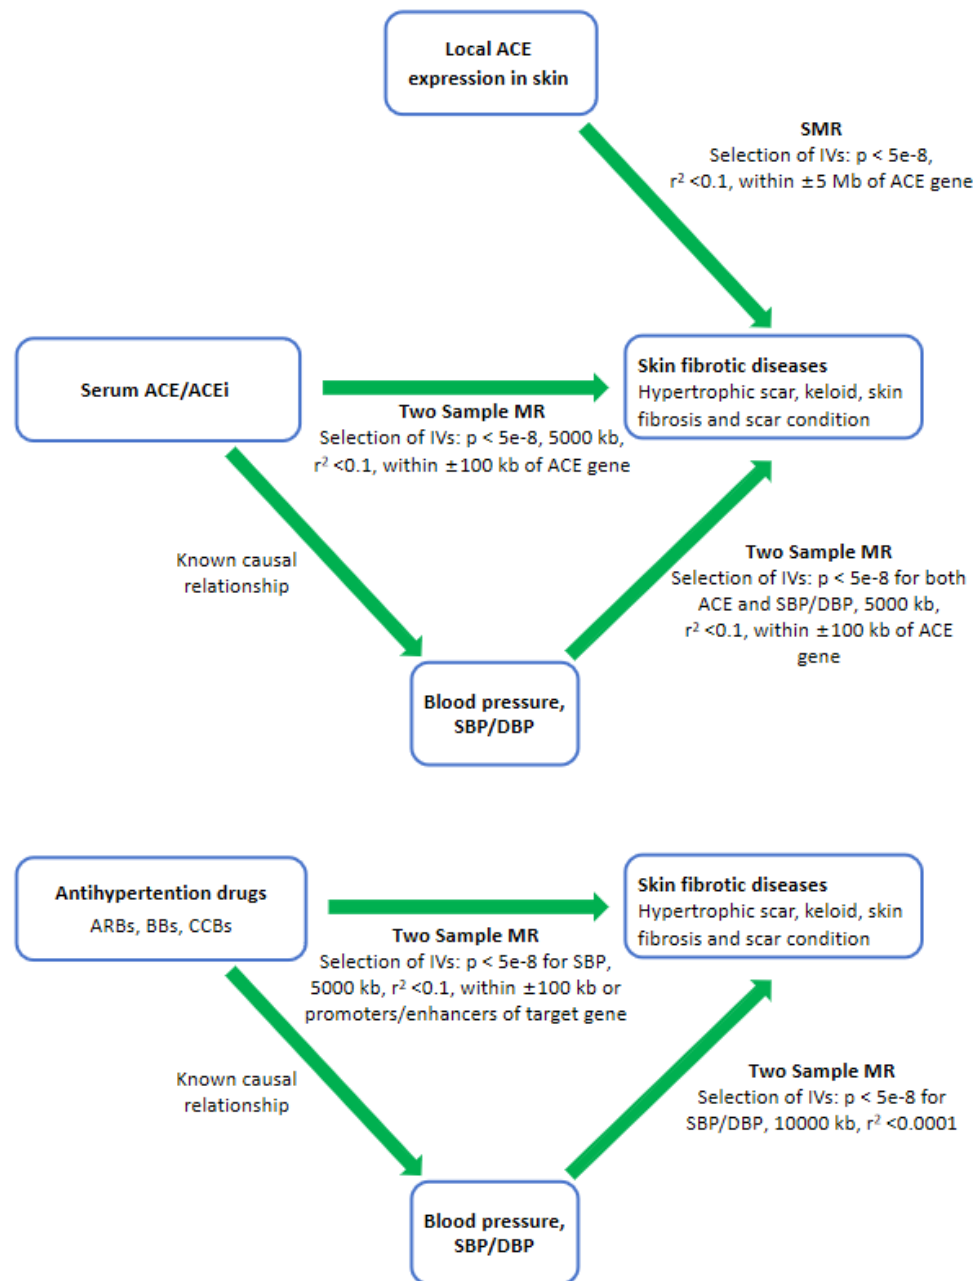

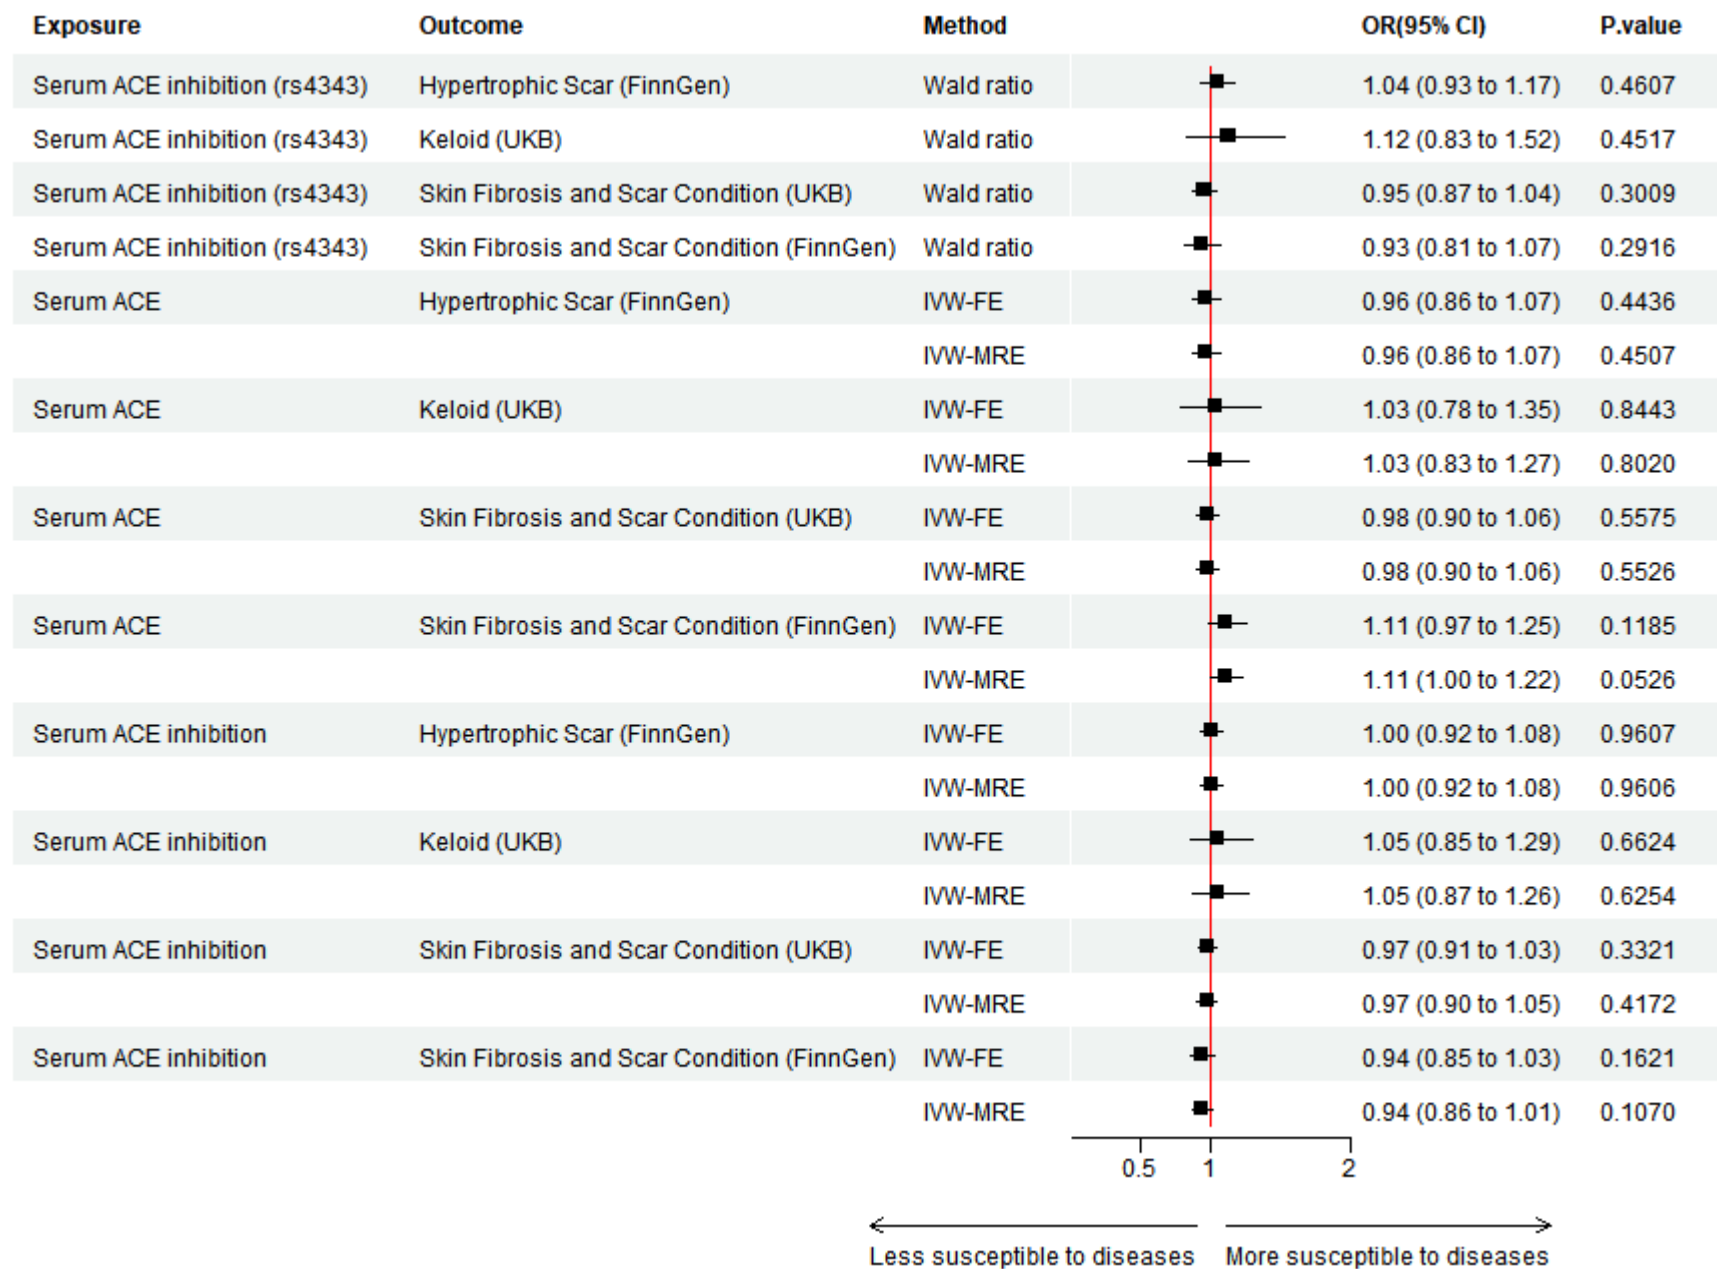

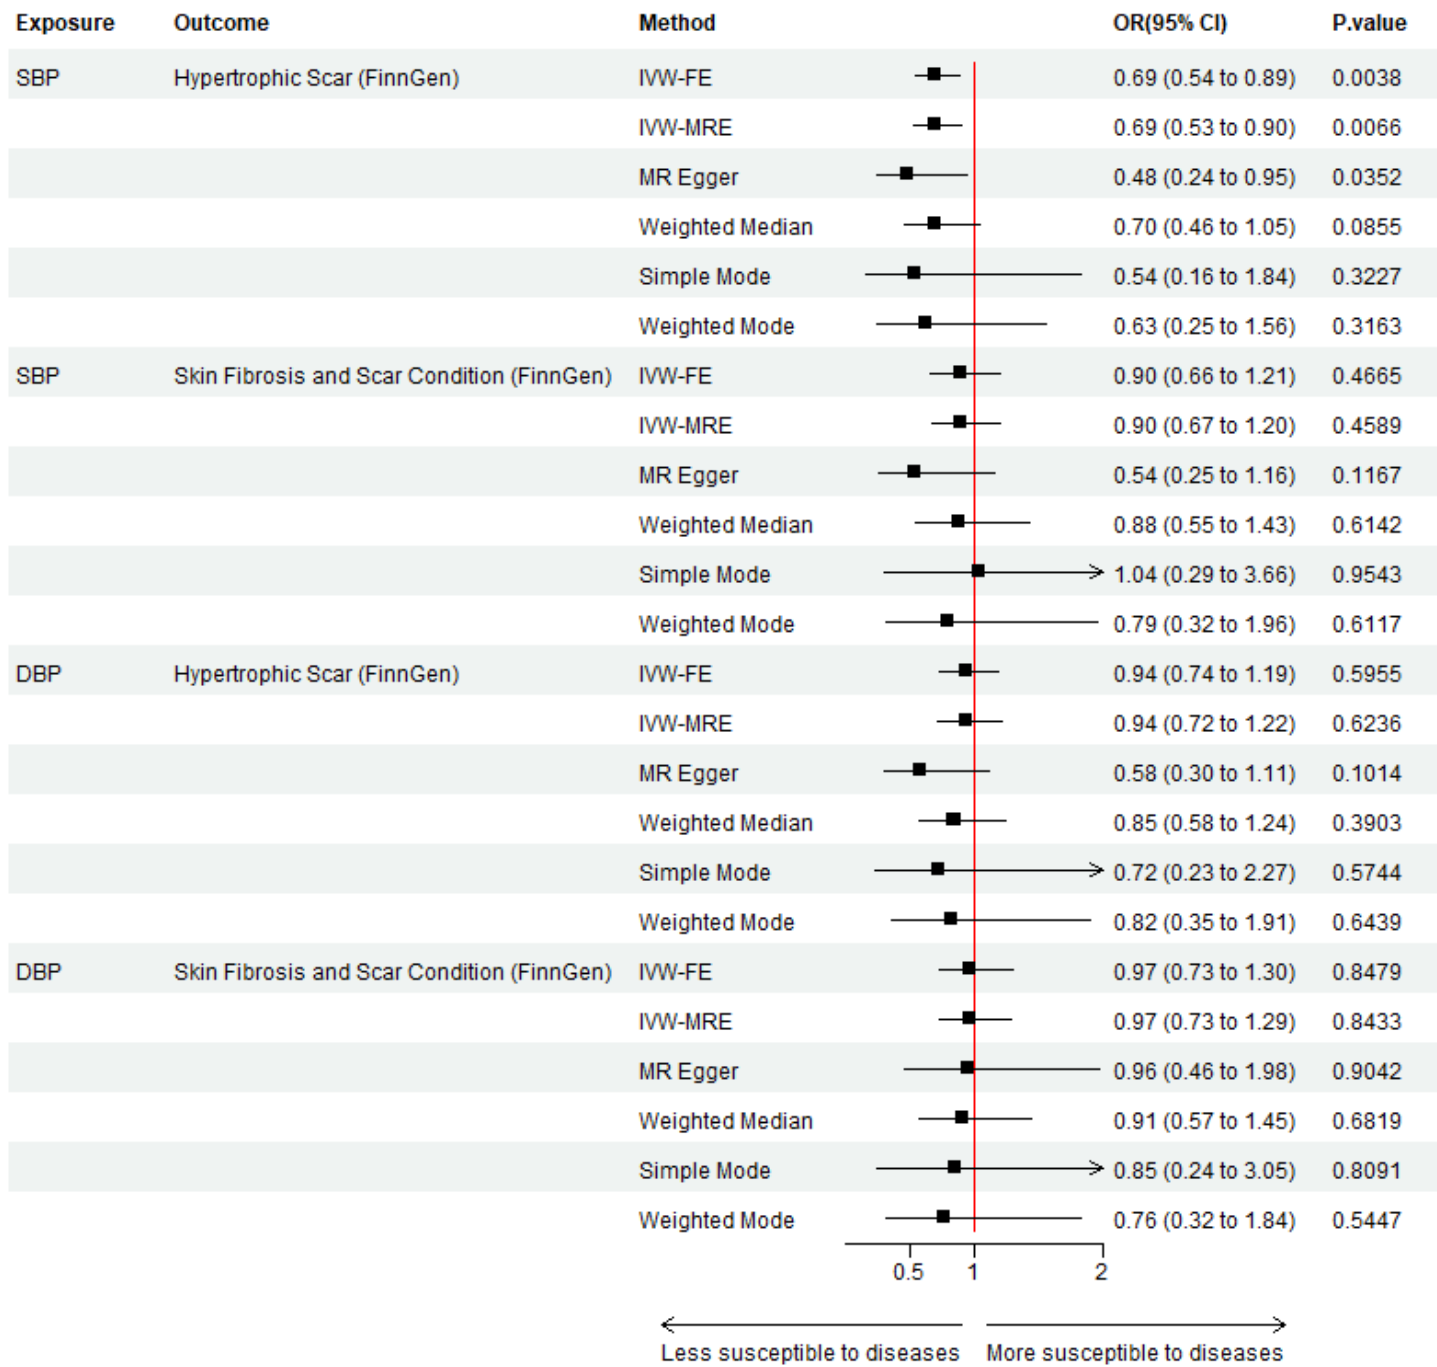

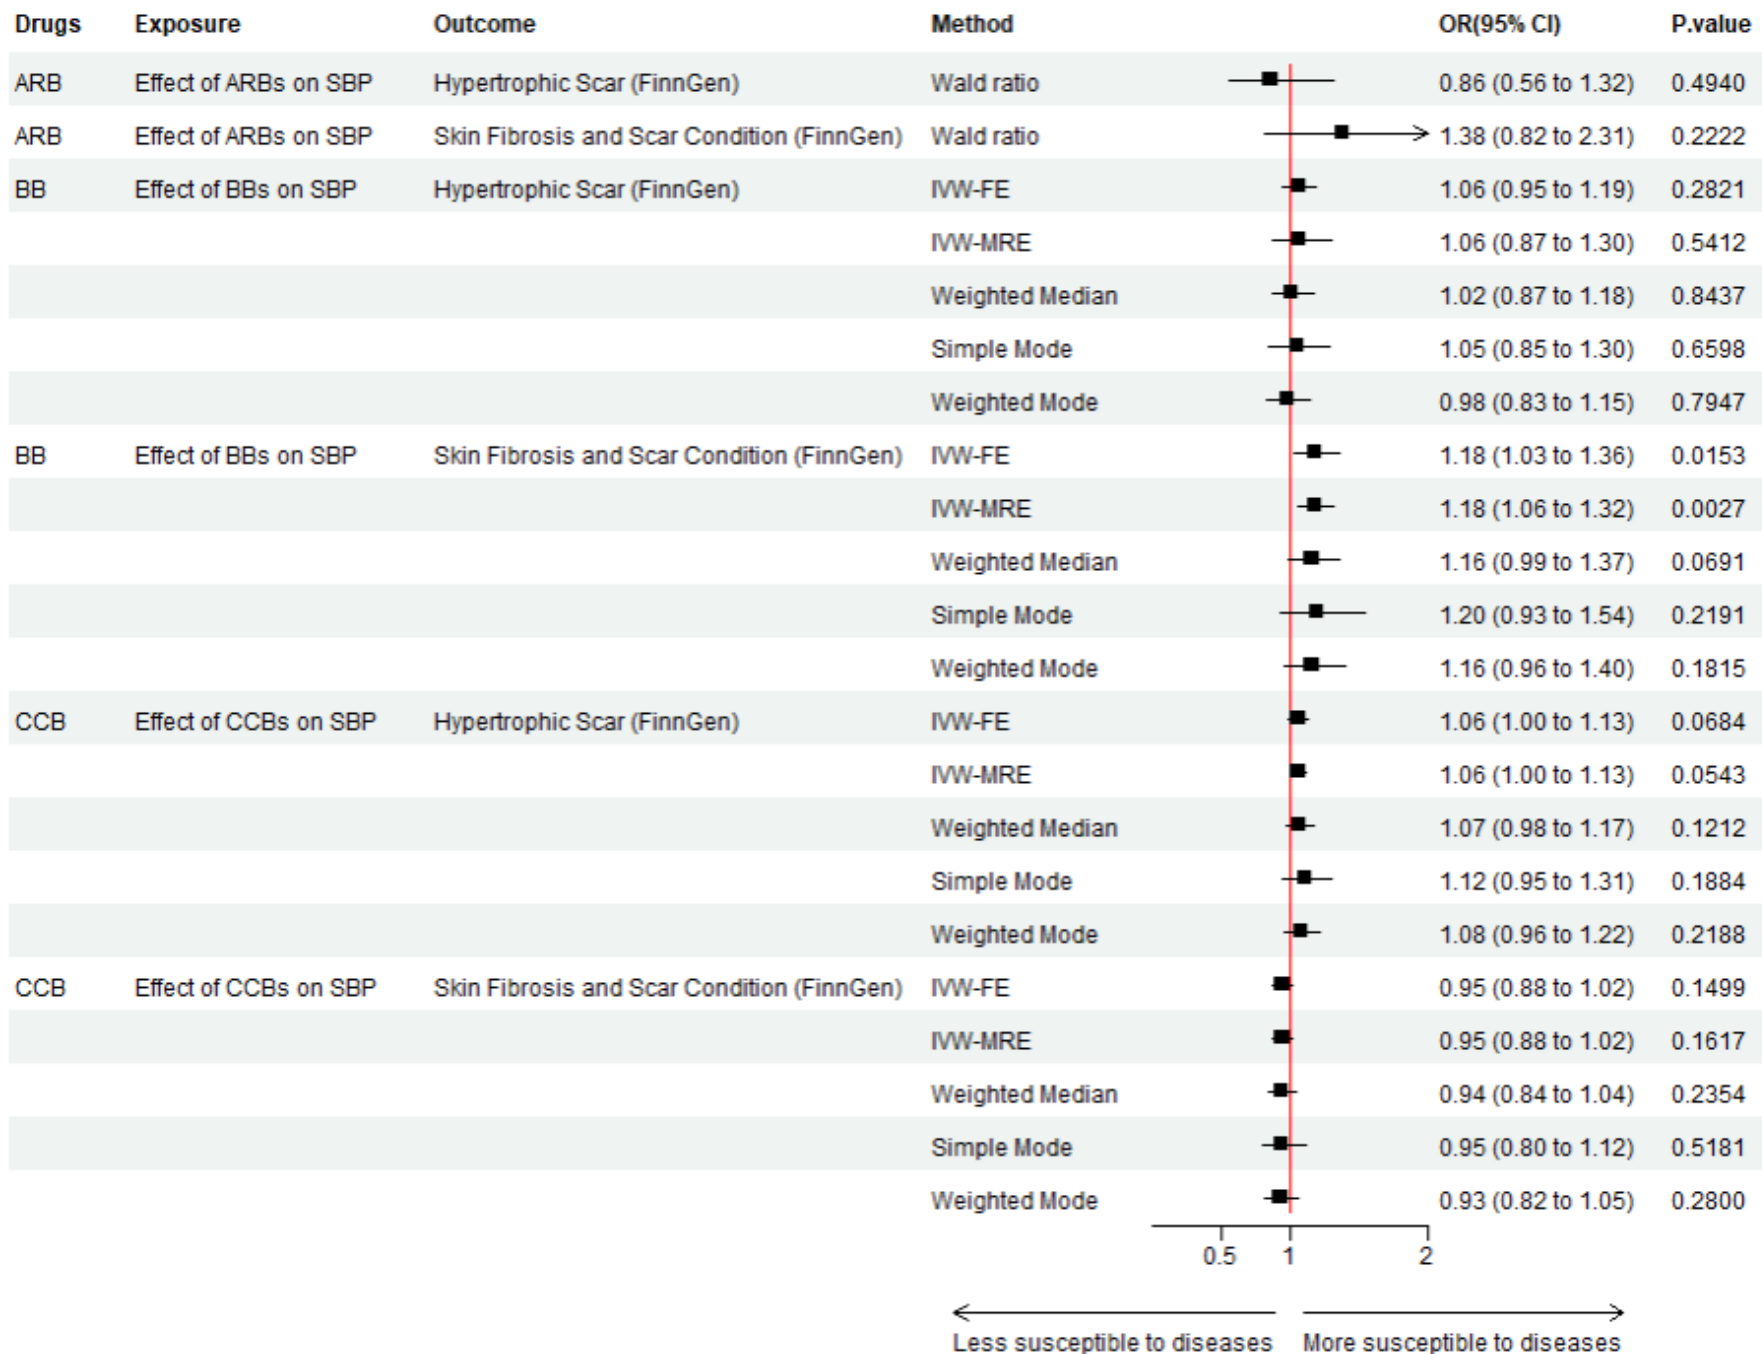

Source: https://medrxiv.org/content/10.1101/2024.07.23.24310902v1.full.pdf
